# Supplementary material for: MnO2 nanotubes with graphene-assistance as low-cost counter-electrode materials in dye-sensitized solar cells
Source: Royal Society of Chemistry journal article supplement (doi:10.1039/c5ra26995d), 2016-01-01
Supplement: c5ra26995d1.pdf [file c5ra26995d1.pdf]

## Supporting Information

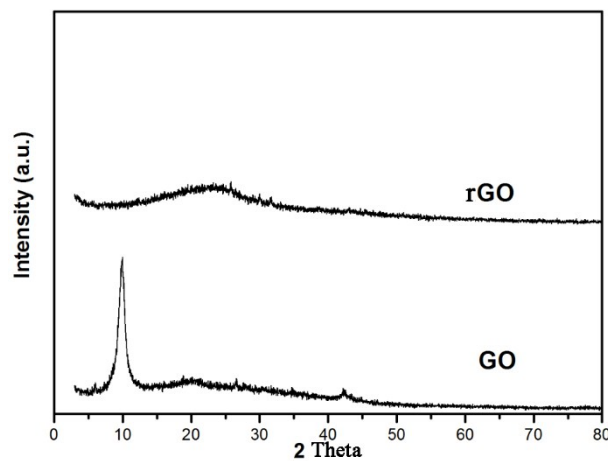

Fig. S1. XRD patterns of sample: rGO and GO.

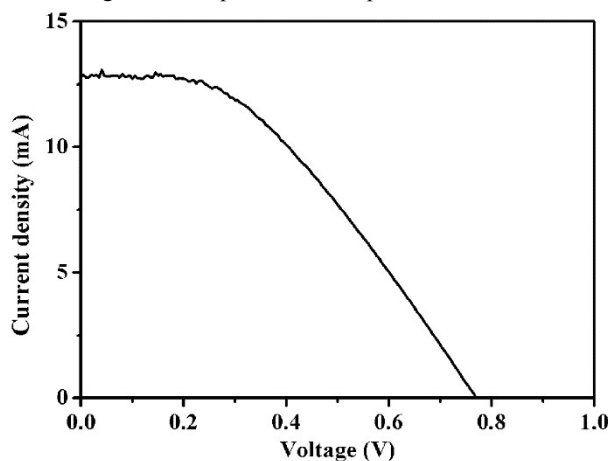

Fig. S2. Photocurrent–voltage curves of the DSSCs with rGO.

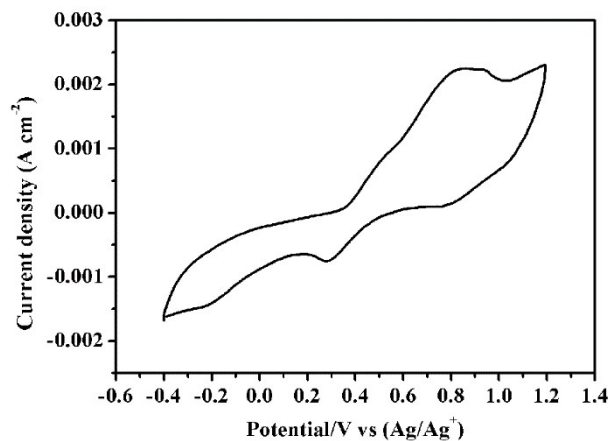

Fig.S3. Cyclic voltammograms of the triiodide/iodide redox couple for rGO.

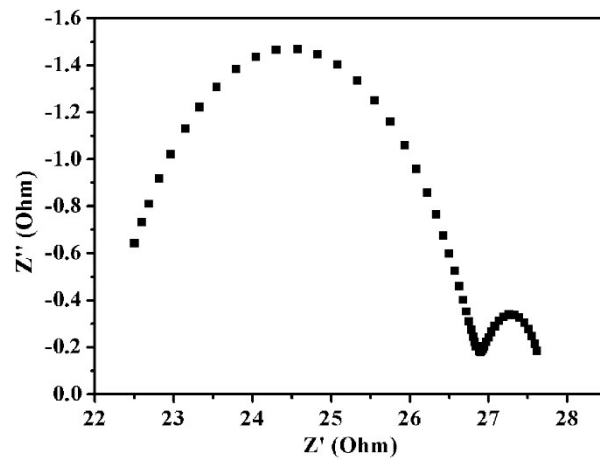

Fig.S4. Nyquist plots of the symmetrical cells fabricated with rGO.
